# Supplementary material for: Passive immunization of macaques with polyclonal anti-SHIV IgG against a heterologous tier 2 SHIV: outcome depends on IgG dose
Source: PubMed Central journal article supplement (PMC3905655; doi:10.1186/1742-4690-11-8), 2014-01-20
Supplement: 1742-4690-11-8-S1.pdf [file 1742-4690-11-8-S1.pdf]

**Table S1 Treatment history and clinical parameters for cohort of RMs used to isolate SHIVIG**

| Monkey | Virus exposure                 | Other treatments                                                                                                                       | Viral RNA copies/ml |                   | CD4 count | Number of months infected | Clinical status                                                 | Ref.        |
|--------|--------------------------------|----------------------------------------------------------------------------------------------------------------------------------------|---------------------|-------------------|-----------|---------------------------|-----------------------------------------------------------------|-------------|
|        |                                |                                                                                                                                        | Peak                | Last              |           |                           |                                                                 |             |
| RAo-8  | SHIV-1157ip passage            | -                                                                                                                                      | $2.8 \times 10^7$   | <50               | 624       | 110                       | systemic infection, LTNP                                        | [12]        |
| RCt-10 | SHIV-1157ipd3N4                | DNA prime:<br>pJW-gp160-1157ip<br>pJWSIVgag-pro<br>pJWHIVtat<br>protein boost:<br>SHIV-1157ip gp160<br>AT-2-inactivated SIV<br>HIV Tat | $2 \times 10^7$     | <50               | 290       | 52                        | sacrificed due to acute pneumonia                               | unpub. data |
| RHo-10 | SHIV-1157ipd3N4                | -                                                                                                                                      | $7.1 \times 10^7$   | 250               | 414       | 60                        | persistently viremic                                            | unpub. data |
| RHy-9  | SHIV-1157ip<br>SHIV-1157ipd3N4 | DNA prime:<br>pJW-gp160-1048i<br>pJWSIVgag-pro<br>pJWHIVtat<br>protein boost:<br>HIV1084i gp160<br>SIV Gag-Pol particles<br>HIV Tat    | $6.3 \times 10^4$   | <50               | 694       | 37                        | systemic infection, LTNP,<br>sacrificed due to behavior problem | [14]        |
| RJa-9  | SHIV-1157ip oral titration     | <i>S. mansoni</i>                                                                                                                      | $3.7 \times 10^6$   | <50               | 596       | 102                       | systemic infection, LTNP                                        | [13]        |
| RLu-9  | SHIV-1157ip<br>SHIV-1157ipd3N4 | HIV1084i gp160<br>SIV Gag-Pol particles<br>HIV Tat                                                                                     | $7.8 \times 10^5$   | <50               | 330       | 122                       | systemic infection, LTNP                                        | [13]        |
| RMf-9  | SHIV-1157ip oral titration     | <i>S. mansoni</i>                                                                                                                      | $7.2 \times 10^7$   | <50               | 479       | 101                       | systemic infection, LTNP                                        | [14]        |
| RPo-10 | SHIV-1157ip passage            | -                                                                                                                                      | $5 \times 10^7$     | $2.1 \times 10^5$ | 485       | 54                        | sacrificed due to mycobacteriosis                               | [12]        |
| RTs-7  | SHIV-1157ip passage            | -                                                                                                                                      | $6.6 \times 10^5$   | $3.7 \times 10^4$ | 14        | 87                        | systemic infection, death from AIDS                             | [12]        |
