# Supplementary material for: Passive immunization of macaques with polyclonal anti-SHIV IgG against a heterologous tier 2 SHIV: outcome depends on IgG dose
Source: PubMed Central journal article supplement (PMC3905655; doi:10.1186/1742-4690-11-8), 2014-01-20
Supplement: 1742-4690-11-8-S2.pdf [file 1742-4690-11-8-S2.pdf]

**Table S2 Genetic characteristics of rhesus monkeys enrolled into the study**

| Group name             | RM                  | TRIM5 $\alpha$ genotype | Susceptibility to infection (based on TRIM5 $\alpha$ ) | MHC genotype <sup>a</sup> |
|------------------------|---------------------|-------------------------|--------------------------------------------------------|---------------------------|
| Group 1<br>(400 mg/kg) | RKg-12              | CYP A / CYP A           | less                                                   | B17                       |
|                        | RKs-12              | TFP / TFP               | less                                                   | —                         |
|                        | RQv-12              | TFP / CYP A             | less                                                   | —                         |
|                        | RRm-12              | TFP / CYP A             | less                                                   | A01                       |
|                        | RVv-12              | TFP / Q                 | moderate                                               | B17                       |
|                        | RZn-12              | TFP / Q                 | moderate                                               | B17                       |
| Group 2<br>(675 mg/kg) | RRs-12              | Q / CYP A               | moderate                                               | —                         |
|                        | RZu-11              | TFP / Q                 | moderate                                               | —                         |
| Group 3<br>(25 mg/kg)  | RJu-11              | Q / CYP A               | moderate                                               | —                         |
|                        | RKz-11              | CYP A / CYP A           | less                                                   | —                         |
|                        | RNz-11              | Q / CYP A               | moderate                                               | —                         |
|                        | ROw-11              | Q / Q                   | most                                                   | A01                       |
|                        | RWt-12              | TFP / CYP A             | less                                                   | —                         |
|                        | RZa-12              | CYP A / CYP A           | less                                                   | B17                       |
| Group 4<br>(controls)  | RCa-12              | Q / CYP A               | moderate                                               | B17                       |
|                        | REv-12              | TFP / CYP A             | less                                                   | B08                       |
|                        | RHc-12              | TFP / Q                 | moderate                                               | —                         |
|                        | RHm-11              | Q / CYP A               | moderate                                               | A01                       |
|                        | RHv-11              | TFP / CYP A             | less                                                   | —                         |
|                        | RMs-11              | CYP A / CYP A           | less                                                   | A01                       |
|                        | RPI-12              | TFP / Q                 | moderate                                               | A01                       |
|                        | RSc-12 <sup>b</sup> | TFP / CYP A             | less                                                   | —                         |
|                        | RSm-11              | TFP / TFP               | less                                                   | A01                       |
|                        | RVu-11              | TFP / TFP               | less                                                   | —                         |
|                        | RWI-11              | TFP / Q                 | moderate                                               | A01                       |
|                        | RWo-12              | TFP / TFP               | less                                                   | A01                       |
|                        | RWu-11              | TFP / CYP A             | less                                                   | —                         |
|                        | RZw-10              | TFP / CYP A             | less                                                   | —                         |

<sup>a</sup>MHC genotyping done with B17, B08, A01. "—" indicates that the animal was negative for all the 3 genotypes

<sup>b</sup>Monkey RSc-12 had a delay in receiving the 5<sup>th</sup> weekly i.r. challenge; therefore, only data for this RM including the 4<sup>th</sup> challenge are included.
